# Supplementary material for: JNK1/2 regulate Bid by direct phosphorylation at Thr59 in response to ALDH1L1
Source: PubMed Central journal article supplement — Cell Death Dis. 2014 Jul 31;5(7):e1358–. doi: 10.1038/cddis.2014.316 (PMC4123105; doi:10.1038/cddis.2014.316), 2014-07-31
Supplement: cddis2014316x1.pdf [file cddis2014316x1.pdf]

Table S1 Primers used for Bid amplification and mutagenesis

| Gene     | Orientation | Sequence                           |
|----------|-------------|------------------------------------|
| Bid      | Forward     | 5' -ATGGACTGTGAGGTCAAC-3'          |
|          | Reverse     | 5' -TCAGTCCATCCCATTTCTG-3'         |
| Bid T59A | Forward     | 5' -GATGAGCTGCAGGCTGATGGCAAC-3'    |
|          | Reverse     | 5' -GTTGCCATCAGCCTGCAGCTCATC-3'    |
| Bid T59D | Forward     | 5' -GATGAGCTGCAGGATGATGGCAACCGC-3' |
|          | Reverse     | 5' -GCGGTTGCCATCATCCTGCAGCTCATC-3' |
